# Supplementary material for: Reversible systems based on CO2, amino-acids and organic superbases
Source: Royal Society of Chemistry journal article supplement (doi:10.1039/c5ra03474d), 2015-01-01
Supplement: c5ra03474d1.pdf [file c5ra03474d1.pdf]

### $^1\text{H-NMR}$ spectra of $[\text{TMGH}]_2[\text{PheCO}_2]$ and $[\text{DBUH}]_2[\text{PheCO}_2]$ in DMSO

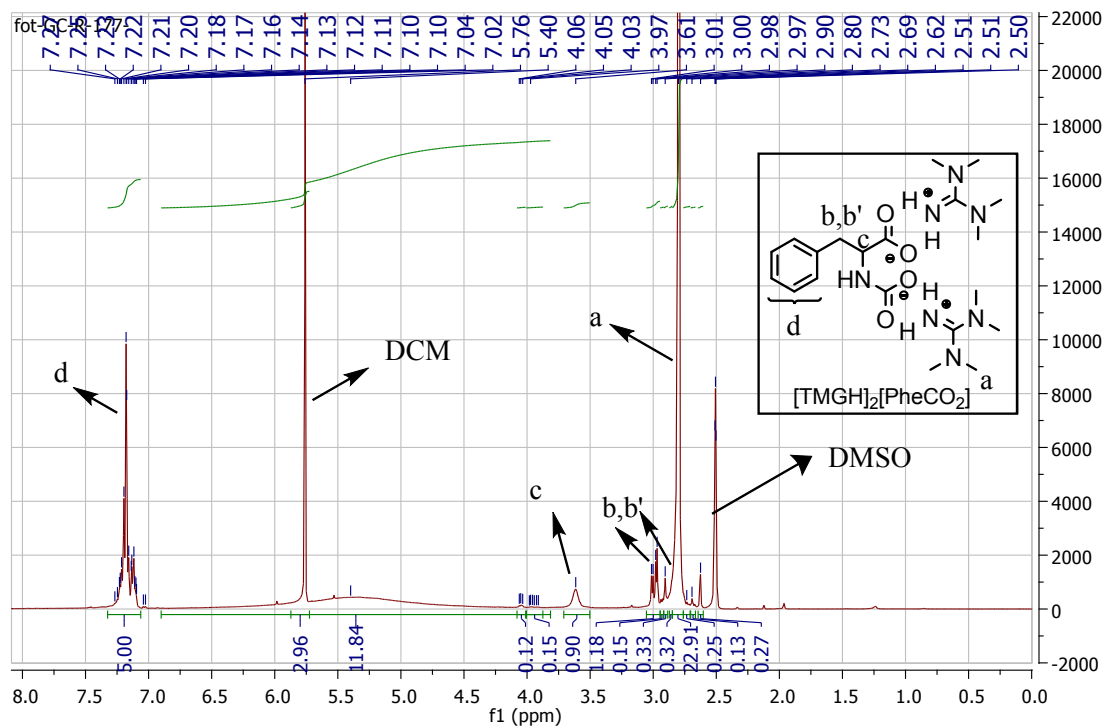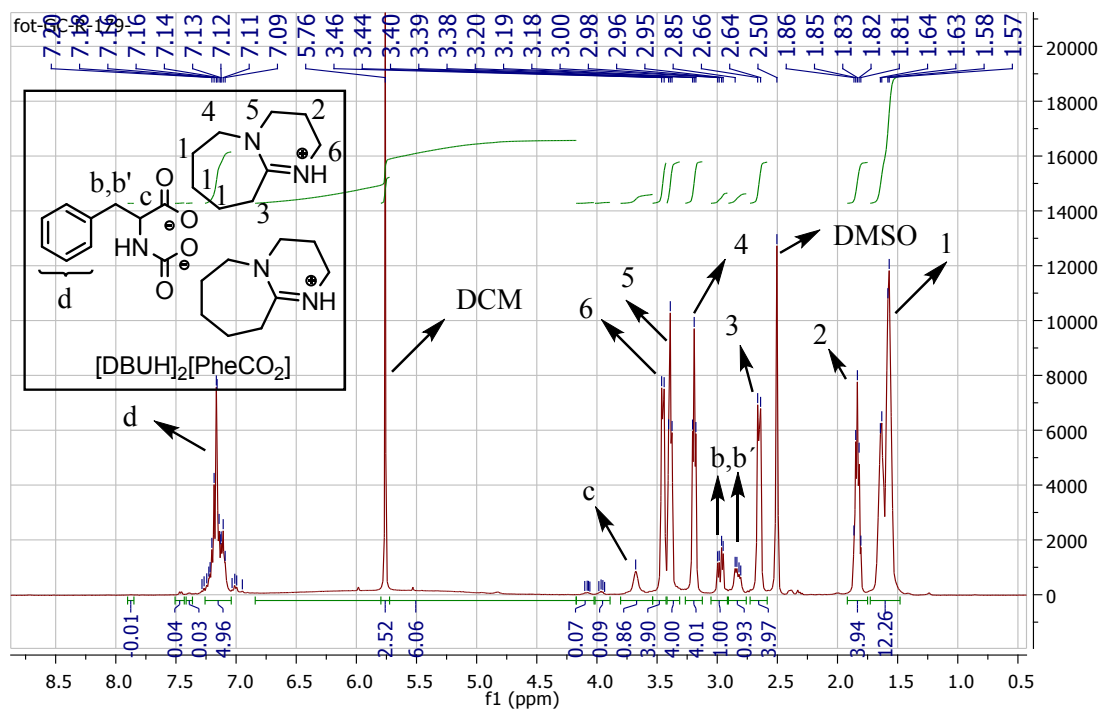

<sup>13</sup>C-NMR spectra of [TMGH]<sub>2</sub>[PheCO<sub>2</sub>] and [DBUH]<sub>2</sub>[PheCO<sub>2</sub>] in DMSO

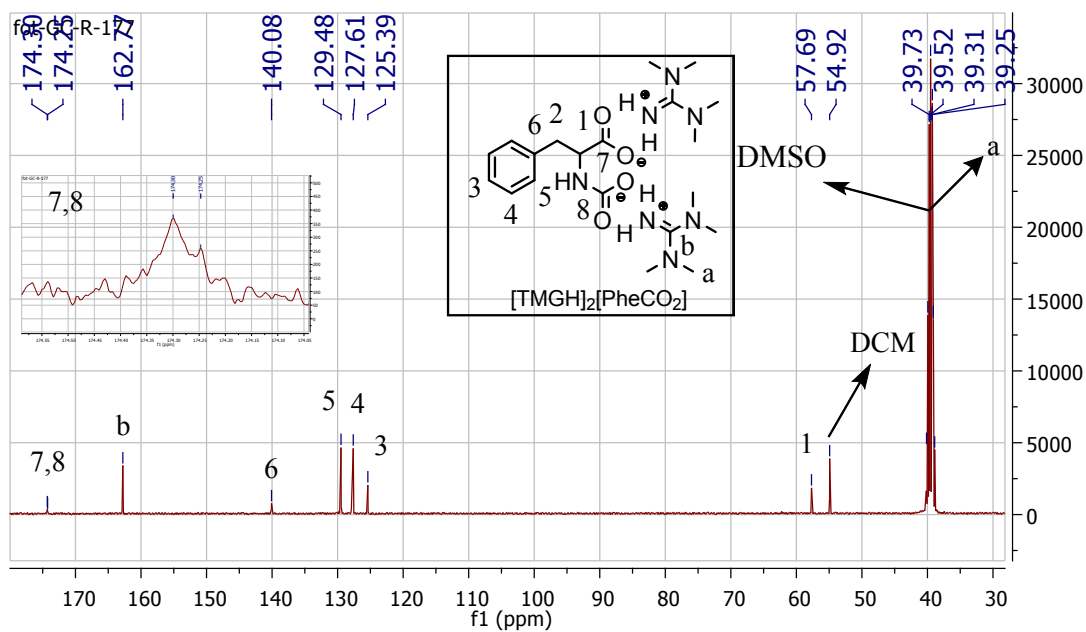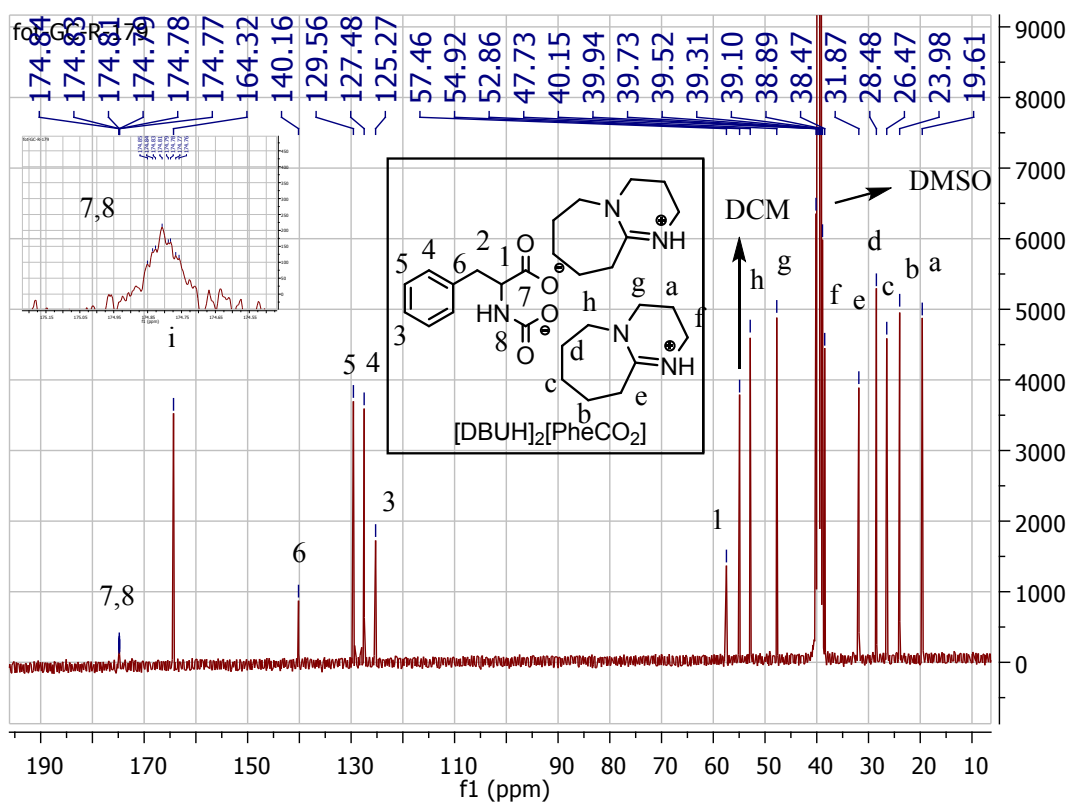

## FTIR spectra of [TMGH]<sub>2</sub>[PheCO<sub>2</sub>] and [DBUH]<sub>2</sub>[PheCO<sub>2</sub>] in KBr

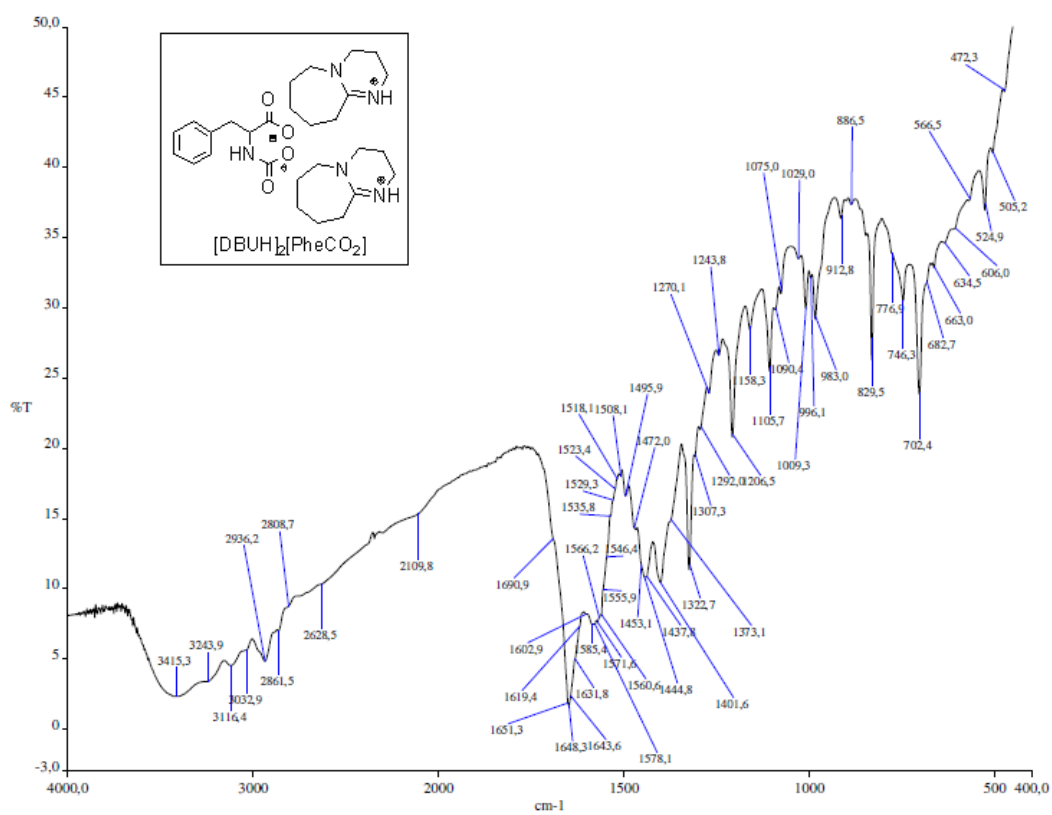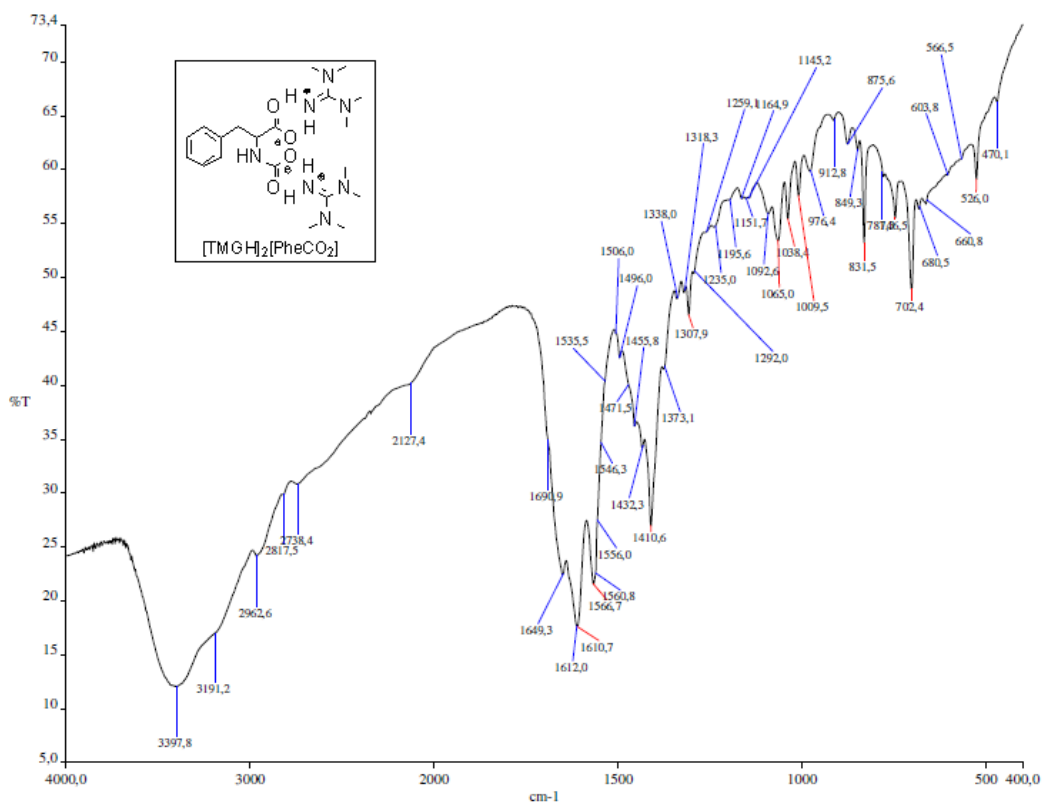

## FTIR: carbamate and carboxylate characteristic bands of the prepared TMG based compounds

| Compounds<br>(TMGH <sup>+</sup> based carbamates)        | FTIR<br>cm <sup>-1</sup><br><br>COO <sup>-</sup><br><br>  COO <sup>-</sup><br>Zwitterionic<br>aminoacid | FTIR<br>cm <sup>-1</sup><br><br>NCOO <sup>-</sup><br><br>{NCOO- from carbamate based TSILs [17]; from carbamate based amino-esters [13];<br>(NCOO ammonium carbamate <sup>a</sup> [22])<br>  Bands not present in the spectra of TMGH <sup>+</sup> . AA: [24] <sup>b</sup> }                                                            |
|----------------------------------------------------------|---------------------------------------------------------------------------------------------------------|-----------------------------------------------------------------------------------------------------------------------------------------------------------------------------------------------------------------------------------------------------------------------------------------------------------------------------------------|
| [TMGH <sup>+</sup> ] <sub>2</sub> [GlyCOO <sup>-</sup> ] |                                                                                                         | 1606 s, 1592 s  <br>{1666, 1575}<br>(1650 s, 1400 s, 1300 m, 1024 w, 1010 w, 978 w, 831 m, 701 m, 666)<br><b>1700.00 m, 1561.57 s, 1561.6 s</b><br>1373.24 m, 1317.21 m, 1008.72 w, 979.81 w, 831.40 mw, 703.25 w, 668.29 w                                                                                                             |
| [TMGH <sup>+</sup> ] <sub>2</sub> [AlaCOO <sup>-</sup> ] |                                                                                                         | 1621 s, 1589 s  <br>{1666, 1575}<br>(1400 s, 1300 m, 1024 w, 1010 w, 978 w, 831 m, 701 m, 666 w)<br><b>1668.42 s, 1587.17 s, 1567.35 s, 1508.34 m</b><br>1372.48 m, 1329.95 m, 1m, 1009.1 w, 989.47 w, 830.8 w, 703.6 w, 669.3 w                                                                                                        |
| [TMGH <sup>+</sup> ] <sub>2</sub> [ValCOO <sup>-</sup> ] |                                                                                                         | 1612 s, 1586 s, 1566 s  <br>{1666, 1575}<br>(1400 s, 1300 m, 1024 w, 1010 w, 978 w, 831 m, 701 m, 666 w)<br><b>1672.13 m, 1587.17 s, 1567.35 s</b><br>1372.48 m, 1329.95 w, 1008.34 w, 980.38 w, 830.95 w, 703.68 w, 664.43 w                                                                                                           |
| [TMGH <sup>+</sup> ] <sub>2</sub> [LeuCOO <sup>-</sup> ] |                                                                                                         | 1610 s, 1583 s  <br>{1666, 1575}<br>(1400 s, 1300 m, 1024 w, 1010 w, 978 w, 831 m, 701 m, 666 w)<br><b>1688 m, 1566.36 sl</b><br>1373.14 m, 1316.54 m, 1297.16 m, 1009.73 w, 979.28 w, 831.21 m, 703.81 m, 668.97 m                                                                                                                     |
| [TMGH <sup>+</sup> ] <sub>2</sub> [PheCOO <sup>-</sup> ] |                                                                                                         | 1626 s, 1562 s  <br>{1666, 1575}<br>(1400 s, 1300 m, 1024 w, 1010 w, 978 w, 831 m, 701 m, 666 w)<br><b>1690.9 m, 1566.7 s, 1560.8 s, 1556.0 s, 1546.3 s, 1535.5 m</b><br>1373.10 m, 1307.90 m, 1292.0 m, 1009.5 w, 976.4 w, 831.5 m, 702.4 m, 660.8 w<br> 1373.10, 1009.5, 976.4, 831.5, 702.4, 660.8                                   |
| [TMGH <sup>+</sup> ] <sub>2</sub> [TrpCOO <sup>-</sup> ] |                                                                                                         | 1665 s, 1612 s, 1584 s  <br>{1666, 1575}<br>(1400 s, 1300 m, 1024 w, 1010 w, 978 w, 831 m, 701 m, 666 w)<br><b>1663.30 s, 1654.20 s, 1636.00 s, 1584.8 s, 1577.9 s, 1570.3 s, 1560.5 s, 1545.2 m, 1534.5 w, 1527.6 w</b><br>1375.0 m, 1313.9 w, 1292.0 w, 1007.1 w, 985.2 w, 829.5 w, 704.6 w, 660.8 w<br> 1375.0, 1292.0, 829.5, 704.6 |

a: characteristic bands of ammonium carbamate after comparison with ammonium chloride. b: Not present within 5 cm<sup>-1</sup> interval.

## FTIR: carbamate and carboxylate characteristic bands of the prepared DBU based compounds

| Compounds<br>(DBUH <sup>+</sup> based carbamates)        | FTIR<br>cm <sup>-1</sup><br><br>COO <sup>-</sup><br><br>  Zwitterionic aminoacid<br>COO <sup>-</sup> | FTIR<br>cm <sup>-1</sup><br><br>NCOO <sup>-</sup><br><br>(NCOO <sup>-</sup> ammonium carbamate <sup>a</sup> [22])<br>{NCOO <sup>-</sup> from carbamate based amino-esters [13]; from carbamate based TSILs [17]}<br>  Bands not present in the spectra of TMGH <sup>+</sup> . AA <sup>-</sup> [24] <sup>b</sup>                                                                                                                                    |
|----------------------------------------------------------|------------------------------------------------------------------------------------------------------|----------------------------------------------------------------------------------------------------------------------------------------------------------------------------------------------------------------------------------------------------------------------------------------------------------------------------------------------------------------------------------------------------------------------------------------------------|
| [DBUH <sup>+</sup> ] <sub>2</sub> [GlyCOO <sup>-</sup> ] |                                                                                                      | 1606 s, 1592 s  <br>{1666, 1575}<br>(1400 s, 1300 m, 1024 w, 1010 w, 978 w, 831 m, 701 m, 666 w)<br><b>1687.00 m, 1603.00 m, 1593.00 m</b><br>1372.51 w, 1324.78 m, 1301.59 w, 1008.91 w, 984.43 w,<br>831.37 w, 704.11 w<br> 1372.51, 704.11                                                                                                                                                                                                      |
| [DBUH <sup>+</sup> ] <sub>2</sub> [AlaCOO <sup>-</sup> ] |                                                                                                      | 1621 s, 1589 s  <br>{1666, 1575}<br>(1400 s, 1300 m, 1024 w, 1010 w, 978 w, 831 m, 701 m, 666 w)<br><b>1691.43 m, 1641.00 s, 1589.56 s, 1566.43 s, 1519.76 m</b><br>1365.18 m, 1326.57 m, 1309.24 m, 1012.19 w, 986.89 w,<br>833.55 w, 706.15 w, 666.11 w<br> 1326.57, 833.55, 706.15                                                                                                                                                              |
| [DBUH <sup>+</sup> ] <sub>2</sub> [ValCOO <sup>-</sup> ] |                                                                                                      | 1612 s, 1586 s, 1566 s  <br>{1666, 1575}<br>(1400 s, 1300 m, 1024 w, 1010 w, 978 w, 831 m, 701 m, 666 w)<br><b>1690.84 m, 1632.50 m, 1586.60 s, 1583.00 m</b><br>1371.73 m, 1326.50 m, 1308.72 w, 1009.02 w, 985.20 w,<br>831.32 w, 703.71 w, 664.86 w                                                                                                                                                                                             |
| [DBUH <sup>+</sup> ] <sub>2</sub> [LeuCOO <sup>-</sup> ] |                                                                                                      | 1610 s, 1583 s  <br>{1666, 1575}<br>(1400 s, 1300 m, 1024 w, 1010 w, 978 w, 831 m, 701 m, 666 w)<br><b>1692.22 m, 1625.47 s, 1614.05 m, 1603.19 m, 1568.39 m,</b><br><b>1563.17 m</b><br>1371.23 m, 1325.20 m, 1296.31 m, 1009.42 w, 984.41 w,<br>831.38 w, 703.40 w, 669.43 w                                                                                                                                                                     |
| [DBUH <sup>+</sup> ] <sub>2</sub> [PheCOO <sup>-</sup> ] |                                                                                                      | 1626 s, 1562 s  <br>{1666, 1575}<br>(1400 s, 1300 m, 1024 w, 1010 w, 978 w, 831 m, 701 m, 666 w)<br><b>1690.9 m, 1651.3 s, 1643.6 s, 1631.8 s, 1619.4 s, 1602.9 s,</b><br><b>1585.4 s, 1578.1 s, 1571.6 s, 1566.2 s, 1560.6 s, 1555.9 s,</b><br><b>1546.4 m, 1535.8 m, 1529.3 m, 1523.4 m, 1518.1 m</b><br>1373.1 m, 1322.7 s, 1307.3 m, 1292.0 m, 1009.3 w, 970.5 w,<br>829.5 w, 702.4 w, 663.0 w<br> 1373.1, 1292.0, 1009.3, 970.5, 829.5, 663.0 |
| [DBUH <sup>+</sup> ] <sub>2</sub> [TrpCOO <sup>-</sup> ] |                                                                                                      | 1665 s, 1612 s, 1584 s  <br>{1666, 1575}<br>(1400 s, 1300 m, 1024 w, 1010 w, 978 w, 831 m, 701 m, 666 w)<br><b>1692.4 m, 1630.8 s, 1620.0 s, 1585.0 s, 1572.4 s, 1556.2 s,</b><br><b>1536.7 m</b><br>1370.8 m, 1324.2 s, 1295.9 m, 1008.6 w, 968.2 w, 830.6 w,<br>703.1 w, 662.7 w<br> 1370.8, 1295.9                                                                                                                                              |

a: characteristic bands of ammonium carbamate after comparison with ammonium chloride. b: within 5 cm<sup>-1</sup> interval.

## DSC Thermograms of [TMGH]<sub>2</sub>[PheCO<sub>2</sub>] and [DBUH]<sub>2</sub>[PheCO<sub>2</sub>]

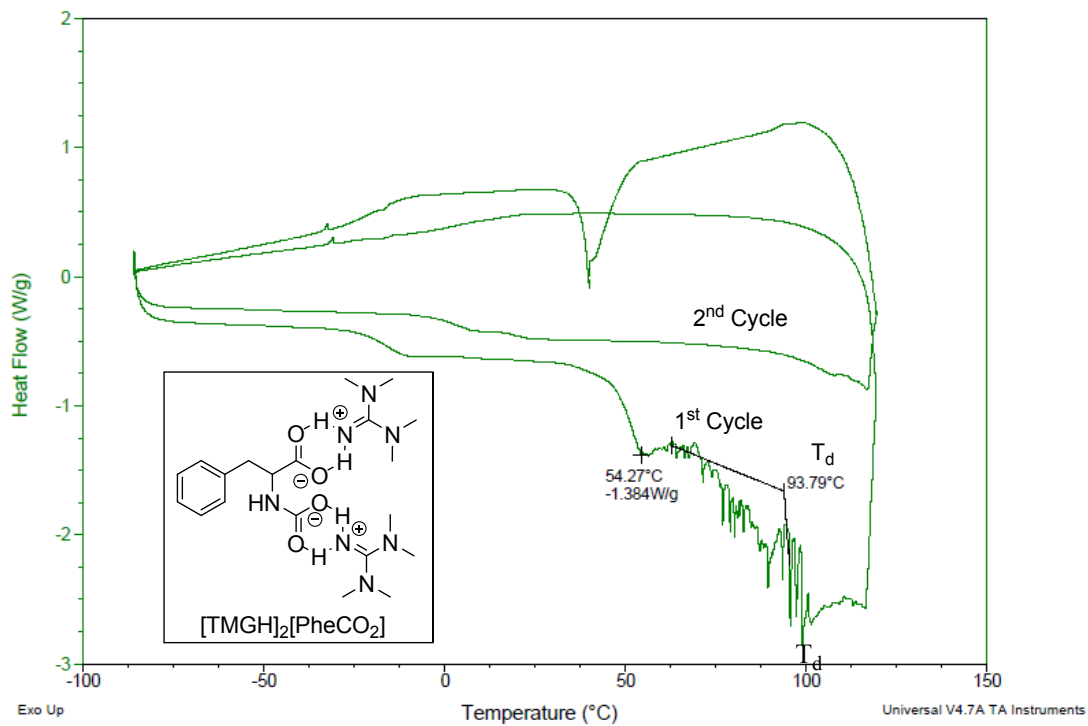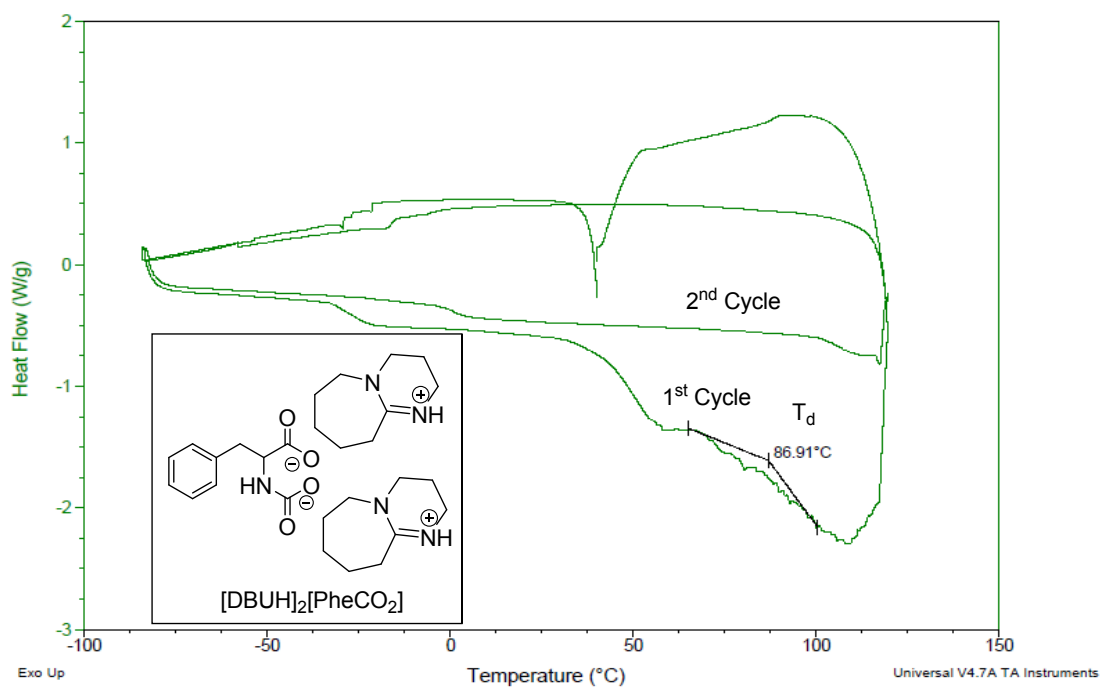

## UV-Visible spectra

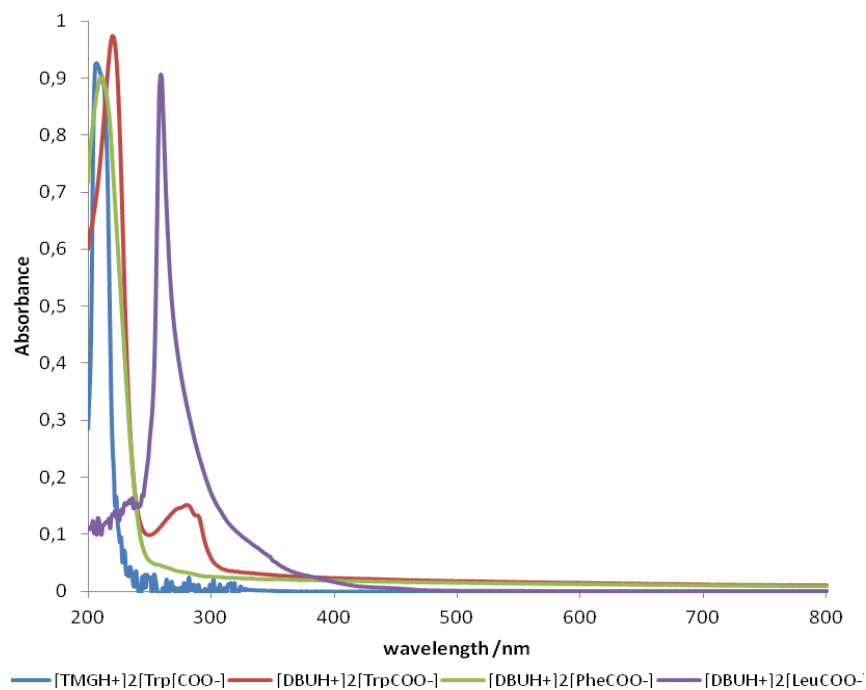

The UV/Vis spectra were collected using a Cary 100 Bio spectrometer and 10 mm quartz absorbance cells.

| Compound                                                 | Solvent | Concentration /M      | $\lambda_{\max}$ /nm |
|----------------------------------------------------------|---------|-----------------------|----------------------|
| [TMGH <sup>+</sup> ] <sub>2</sub> [TrpCOO <sup>-</sup> ] | Acetone | $2.41 \times 10^{-5}$ | 207                  |
| [DBUH <sup>+</sup> ] <sub>2</sub> [TrpCOO <sup>-</sup> ] | Ethanol | $2.35 \times 10^{-5}$ | 220, 280             |
| [DBUH <sup>+</sup> ] <sub>2</sub> [PheCOO <sup>-</sup> ] | Ethanol | $3.37 \times 10^{-5}$ | 211                  |
| [DBUH <sup>+</sup> ] <sub>2</sub> [LeuCOO <sup>-</sup> ] | DMSO    | $6.66 \times 10^{-3}$ | 259                  |
